# Supplementary material
Source: publisher figshare collection journal article supplement (https://acs.figshare.com/ndownloader/files/5116588)
Supplement: Supplementary file 1 [file 5116588]

 
data_c:\
 
_audit_creation_method            SHELXL-97 
_chemical_name_systematic 
; 
 ? 
; 
_chemical_name_common             silver tris(2-pyridylmethyl)cyclotriguaiacylene hexafluorophosphine
_chemical_melting_point           ? 
_chemical_formula_moiety          ? 
_chemical_formula_sum 
 'C42 H39 Ag1.50 F9 N3 O6 P1.50' 
_chemical_formula_weight          1061.02 
 
loop_ 
 _atom_type_symbol 
 _atom_type_description 
 _atom_type_scat_dispersion_real 
 _atom_type_scat_dispersion_imag 
 _atom_type_scat_source 
 'C'  'C'   0.0033   0.0016 
 'International Tables Vol C Tables 4.2.6.8 and 6.1.1.4' 
 'H'  'H'   0.0000   0.0000 
 'International Tables Vol C Tables 4.2.6.8 and 6.1.1.4' 
 'N'  'N'   0.0061   0.0033 
 'International Tables Vol C Tables 4.2.6.8 and 6.1.1.4' 
 'O'  'O'   0.0106   0.0060 
 'International Tables Vol C Tables 4.2.6.8 and 6.1.1.4' 
 'F'  'F'   0.0171   0.0103 
 'International Tables Vol C Tables 4.2.6.8 and 6.1.1.4' 
 'P'  'P'   0.1023   0.0942 
 'International Tables Vol C Tables 4.2.6.8 and 6.1.1.4' 
 'Ag'  'Ag'  -0.8971   1.1015 
 'International Tables Vol C Tables 4.2.6.8 and 6.1.1.4' 
 
_symmetry_cell_setting            cubic
_symmetry_space_group_name_H-M    F-43c
 
loop_ 
 _symmetry_equiv_pos_as_xyz 
 'x, y, z' 
 'y, -x, -z+1/2' 
 '-x, -y, z' 
 '-y, x, -z+1/2' 
 '-x, z, -y+1/2' 
 'x, -y, -z' 
 '-x, -z, y+1/2' 
 '-z, -y, x+1/2' 
 '-x, y, -z' 
 'z, -y, -x+1/2' 
 'z, x, y' 
 'y, z, x' 
 '-y, -z, x' 
 'z, -x, -y' 
 '-y, z, -x' 
 '-z, -x, y' 
 '-z, x, -y' 
 'y, -z, -x' 
 '-y, -x, z+1/2' 
 'y, x, z+1/2' 
 'x, -z, -y+1/2' 
 'x, z, y+1/2' 
 '-z, y, -x+1/2' 
 'z, y, x+1/2' 
 'x, y+1/2, z+1/2' 
 'y, -x+1/2, -z+1' 
 '-x, -y+1/2, z+1/2' 
 '-y, x+1/2, -z+1' 
 '-x, z+1/2, -y+1' 
 'x, -y+1/2, -z+1/2' 
 '-x, -z+1/2, y+1' 
 '-z, -y+1/2, x+1' 
 '-x, y+1/2, -z+1/2' 
 'z, -y+1/2, -x+1' 
 'z, x+1/2, y+1/2' 
 'y, z+1/2, x+1/2' 
 '-y, -z+1/2, x+1/2' 
 'z, -x+1/2, -y+1/2' 
 '-y, z+1/2, -x+1/2' 
 '-z, -x+1/2, y+1/2' 
 '-z, x+1/2, -y+1/2' 
 'y, -z+1/2, -x+1/2' 
 '-y, -x+1/2, z+1' 
 'y, x+1/2, z+1' 
 'x, -z+1/2, -y+1' 
 'x, z+1/2, y+1' 
 '-z, y+1/2, -x+1' 
 'z, y+1/2, x+1' 
 'x+1/2, y, z+1/2' 
 'y+1/2, -x, -z+1' 
 '-x+1/2, -y, z+1/2' 
 '-y+1/2, x, -z+1' 
 '-x+1/2, z, -y+1' 
 'x+1/2, -y, -z+1/2' 
 '-x+1/2, -z, y+1' 
 '-z+1/2, -y, x+1' 
 '-x+1/2, y, -z+1/2' 
 'z+1/2, -y, -x+1' 
 'z+1/2, x, y+1/2' 
 'y+1/2, z, x+1/2' 
 '-y+1/2, -z, x+1/2' 
 'z+1/2, -x, -y+1/2' 
 '-y+1/2, z, -x+1/2' 
 '-z+1/2, -x, y+1/2' 
 '-z+1/2, x, -y+1/2' 
 'y+1/2, -z, -x+1/2' 
 '-y+1/2, -x, z+1' 
 'y+1/2, x, z+1' 
 'x+1/2, -z, -y+1' 
 'x+1/2, z, y+1' 
 '-z+1/2, y, -x+1' 
 'z+1/2, y, x+1' 
 'x+1/2, y+1/2, z' 
 'y+1/2, -x+1/2, -z+1/2' 
 '-x+1/2, -y+1/2, z' 
 '-y+1/2, x+1/2, -z+1/2' 
 '-x+1/2, z+1/2, -y+1/2' 
 'x+1/2, -y+1/2, -z' 
 '-x+1/2, -z+1/2, y+1/2' 
 '-z+1/2, -y+1/2, x+1/2' 
 '-x+1/2, y+1/2, -z' 
 'z+1/2, -y+1/2, -x+1/2' 
 'z+1/2, x+1/2, y' 
 'y+1/2, z+1/2, x' 
 '-y+1/2, -z+1/2, x' 
 'z+1/2, -x+1/2, -y' 
 '-y+1/2, z+1/2, -x' 
 '-z+1/2, -x+1/2, y' 
 '-z+1/2, x+1/2, -y' 
 'y+1/2, -z+1/2, -x' 
 '-y+1/2, -x+1/2, z+1/2' 
 'y+1/2, x+1/2, z+1/2' 
 'x+1/2, -z+1/2, -y+1/2' 
 'x+1/2, z+1/2, y+1/2' 
 '-z+1/2, y+1/2, -x+1/2' 
 'z+1/2, y+1/2, x+1/2' 
 
_cell_length_a                    35.800(4) 
_cell_length_b                    35.800(4) 
_cell_length_c                    35.800(4) 
_cell_angle_alpha                 90.00 
_cell_angle_beta                  90.00 
_cell_angle_gamma                 90.00 
_cell_volume                      45883(9) 
_cell_formula_units_Z             32 
_cell_measurement_temperature     173(2) 
_cell_measurement_reflns_used     ? 
_cell_measurement_theta_min       ? 
_cell_measurement_theta_max       ? 
 
_exptl_crystal_description        block
_exptl_crystal_colour             colourless
_exptl_crystal_size_max           0.23
_exptl_crystal_size_mid           0.21
_exptl_crystal_size_min           0.18
_exptl_crystal_density_meas       ? 
_exptl_crystal_density_diffrn     1.229 
_exptl_crystal_density_method     'not measured' 
_exptl_crystal_F_000              17088 
_exptl_absorpt_coefficient_mu     0.626 
_exptl_absorpt_correction_type    multiscan 
_exptl_absorpt_correction_T_min   ? 
_exptl_absorpt_correction_T_max   ? 
_exptl_absorpt_process_details    ? 
 
_exptl_special_details 
; 
 ? 
; 
 
_diffrn_ambient_temperature       173(2) 
_diffrn_radiation_wavelength      0.71073 
_diffrn_radiation_type            MoK\a 
_diffrn_radiation_source          'fine-focus sealed tube' 
_diffrn_radiation_monochromator   graphite 
_diffrn_measurement_device_type   CCD
_diffrn_measurement_method        phi and omega scans 
_diffrn_detector_area_resol_mean  ? 
_diffrn_standards_number          ? 
_diffrn_standards_interval_count  ? 
_diffrn_standards_interval_time   ? 
_diffrn_standards_decay_%         ? 
_diffrn_reflns_number             10409 
_diffrn_reflns_av_R_equivalents   0.0832 
_diffrn_reflns_av_sigmaI/netI     0.0594 
_diffrn_reflns_limit_h_min        -34 
_diffrn_reflns_limit_h_max        36 
_diffrn_reflns_limit_k_min        -37 
_diffrn_reflns_limit_k_max        33 
_diffrn_reflns_limit_l_min        -33 
_diffrn_reflns_limit_l_max        13 
_diffrn_reflns_theta_min          3.37 
_diffrn_reflns_theta_max          21.70 
_reflns_number_total              2232 
_reflns_number_gt                 1465 
_reflns_threshold_expression      >2sigma(I) 
 
_computing_data_collection        ? 
_computing_cell_refinement        ? 
_computing_data_reduction         ? 
_computing_structure_solution     'SHELXS-97 (Sheldrick, 1990)' 
_computing_structure_refinement   'SHELXL-97 (Sheldrick, 1997)' 
_computing_molecular_graphics     ? 
_computing_publication_material   ? 
 
_refine_special_details 
; 
 Refinement of F^2^ against ALL reflections.  The weighted R-factor wR and 
 goodness of fit S are based on F^2^, conventional R-factors R are based 
 on F, with F set to zero for negative F^2^. The threshold expression of 
 F^2^ > 2sigma(F^2^) is used only for calculating R-factors(gt) etc. and is 
 not relevant to the choice of reflections for refinement.  R-factors based 
 on F^2^ are statistically about twice as large as those based on F, and R- 
 factors based on ALL data will be even larger. 
 The structure is severly disordered and crystals do not diffract to high 
 angles. The pyridyl ring was modelled as disordered over two positions at 
 50% occupancy. The pyridyl rings and P-F bonds were restrained to be 
 chemically reasonable and the core benzene constrained with an AFIX 66.
 Ag and PF6 occupancies were set according to match microanalysis data. 
 Some low occupancy F positiosn were refined isotropically.
; 
 
_refine_ls_structure_factor_coef  Fsqd  
_refine_ls_matrix_type            full 
_refine_ls_weighting_scheme       calc  
_refine_ls_weighting_details 
 'calc w=1/[\s^2^(Fo^2^)+(0.1000P)^2^+0.0000P] where P=(Fo^2^+2Fc^2^)/3' 
_atom_sites_solution_primary      direct 
_atom_sites_solution_secondary    difmap 
_atom_sites_solution_hydrogens    geom 
_refine_ls_hydrogen_treatment     mixed 
_refine_ls_extinction_method      none 
_refine_ls_extinction_coef        ? 
_refine_ls_abs_structure_details 
 'Flack H D (1983), Acta Cryst. A39, 876-881' 
_refine_ls_abs_structure_Flack    0.1(2) 
_refine_ls_number_reflns          2232 
_refine_ls_number_parameters      249 
_refine_ls_number_restraints      105 
_refine_ls_R_factor_all           0.2193 
_refine_ls_R_factor_gt            0.1574 
_refine_ls_wR_factor_ref          0.4178 
_refine_ls_wR_factor_gt           0.3641 
_refine_ls_goodness_of_fit_ref    2.748 
_refine_ls_restrained_S_all       2.705 
_refine_ls_shift/su_max           0.733 
_refine_ls_shift/su_mean          0.122 
 
loop_ 
 _atom_site_label 
 _atom_site_type_symbol 
 _atom_site_fract_x 
 _atom_site_fract_y 
 _atom_site_fract_z 
 _atom_site_U_iso_or_equiv 
 _atom_site_adp_type 
 _atom_site_occupancy 
 _atom_site_symmetry_multiplicity 
 _atom_site_calc_flag 
 _atom_site_refinement_flags 
 _atom_site_disorder_assembly 
 _atom_site_disorder_group 
Ag1 Ag 0.74893(17) 0.07900(10) 0.92139(11) 0.1187(16) Uani 0.50 1 d P . . 
C1 C 0.59597(15) 0.05811(15) 0.9828(2) 0.065(4) Uani 1 1 d G . . 
C2 C 0.62549(15) 0.07660(17) 0.9999(2) 0.057(4) Uani 1 1 d G . . 
H2 H 0.6207 0.0965 1.0168 0.068 Uiso 1 1 calc R . . 
C3 C 0.66206(15) 0.0659(2) 0.9924(3) 0.124(11) Uani 1 1 d G . . 
C4 C 0.66911(18) 0.0368(2) 0.9678(3) 0.066(4) Uani 1 1 d G . . 
C5 C 0.6396(2) 0.0183(2) 0.9506(2) 0.064(4) Uani 1 1 d G . . 
H5 H 0.6444 -0.0017 0.9338 0.077 Uiso 1 1 calc R . . 
C6 C 0.6030(2) 0.0289(2) 0.9581(2) 0.052(4) Uani 1 1 d G . . 
C21 C 0.55802(15) 0.0718(2) 1.0018(3) 0.046(3) Uani 1 1 d G . . 
H21A H 0.5628 0.0836 1.0264 0.055 Uiso 1 1 calc R . . 
H21B H 0.5403 0.0509 1.0051 0.055 Uiso 1 1 calc R . . 
C22 C 0.6915(2) 0.1209(4) 1.0216(6) 0.175(18) Uani 1 1 d G . . 
H22A H 0.6753 0.1375 1.0072 0.262 Uiso 1 1 calc R . . 
H22B H 0.7164 0.1321 1.0238 0.262 Uiso 1 1 calc R . . 
H22C H 0.6810 0.1172 1.0466 0.262 Uiso 1 1 calc R . . 
O23 O 0.6945(2) 0.0851(3) 1.0027(5) 0.082(4) Uani 1 1 d . . . 
O24 O 0.7061(3) 0.0278(4) 0.9596(4) 0.086(4) Uani 1 1 d . B . 
C25 C 0.7147(3) -0.0050(5) 0.9406(4) 0.067(5) Uani 1 1 d U . . 
H25A H 0.6974 -0.0251 0.9486 0.080 Uiso 1 1 calc R A 1 
H25B H 0.7404 -0.0129 0.9470 0.080 Uiso 1 1 calc R A 1 
C32 C 0.7119(11) -0.0003(11) 0.9012(15) 0.064(12) Uani 0.50 1 d PDU B 1 
N31 N 0.7234(10) 0.0338(11) 0.8839(7) 0.079(9) Uani 0.50 1 d PDU B 1 
C36 C 0.7271(13) 0.0333(16) 0.8460(9) 0.106(12) Uani 0.50 1 d PDU B 1 
H36 H 0.7347 0.0555 0.8335 0.127 Uiso 0.50 1 calc PR B 1 
C35 C 0.7197(13) -0.0002(14) 0.8240(15) 0.088(12) Uani 0.50 1 d PDU B 1 
H35 H 0.7232 0.0015 0.7978 0.106 Uiso 0.50 1 calc PR B 1 
C34 C 0.7080(12) -0.0341(13) 0.8379(12) 0.098(11) Uani 0.50 1 d PDU B 1 
H34 H 0.7029 -0.0557 0.8235 0.118 Uiso 0.50 1 calc PR B 1 
C33 C 0.7049(10) -0.0315(10) 0.8783(10) 0.068(9) Uani 0.50 1 d PDU B 1 
H33 H 0.6971 -0.0536 0.8907 0.082 Uiso 0.50 1 calc PR B 1 
P40 P 0.6154(6) 0.1154(6) 0.8846(6) 0.25(2) Uani 0.67 3 d SPD . . 
F41 F 0.6334(10) 0.1037(10) 0.8453(8) 0.212(15) Uani 0.67 1 d PD . . 
F42 F 0.6203(10) 0.0797(8) 0.9105(9) 0.190(12) Uani 0.67 1 d PD . . 
P50 P 0.6149(3) 0.1149(3) 1.1149(3) 0.112(8) Uani 0.50 3 d SPD . . 
F51 F 0.6013(9) 0.1312(9) 1.0769(6) 0.137(9) Uiso 0.50 1 d PD . . 
F52 F 0.5848(13) 0.1438(13) 1.1298(17) 0.23(2) Uiso 0.50 1 d PD . . 
P60 P 0.7500 -0.0981(10) 0.7500 0.104(10) Uani 0.22 2 d SPD . . 
F61 F 0.7500 -0.0535(11) 0.7500 0.146(18) Uiso 0.33 2 d SPD . . 
F62 F 0.7681(15) -0.0949(16) 0.7915(8) 0.077(16) Uiso 0.17 1 d PD . . 
F63 F 0.7864(15) -0.093(3) 0.724(2) 0.13(3) Uiso 0.17 1 d PD . . 
F64 F 0.7500 -0.1429(12) 0.7500 0.23(4) Uiso 0.33 2 d SPD . . 
C32B C 0.7152(9) -0.0034(13) 0.8982(16) 0.076(14) Uani 0.50 1 d PDU B 2 
C31B C 0.7041(9) 0.0249(14) 0.8723(11) 0.102(13) Uani 0.50 1 d PDU B 2 
H31B H 0.6949 0.0483 0.8808 0.123 Uiso 0.50 1 calc PR B 2 
C36B C 0.7073(9) 0.0173(17) 0.8342(12) 0.108(13) Uani 0.50 1 d PDU B 2 
H36B H 0.6995 0.0358 0.8168 0.129 Uiso 0.50 1 calc PR B 2 
C35B C 0.7213(12) -0.0162(17) 0.8206(16) 0.109(15) Uani 0.50 1 d PDU B 2 
H35B H 0.7241 -0.0211 0.7947 0.131 Uiso 0.50 1 calc PR B 2 
C34B C 0.7306(9) -0.0408(16) 0.8467(10) 0.106(12) Uani 0.50 1 d PDU B 2 
H34B H 0.7402 -0.0639 0.8380 0.127 Uiso 0.50 1 calc PR B 2 
N33B N 0.7282(9) -0.0371(12) 0.8838(10) 0.098(11) Uani 0.50 1 d PDU . 2 
 
loop_ 
 _atom_site_aniso_label 
 _atom_site_aniso_U_11 
 _atom_site_aniso_U_22 
 _atom_site_aniso_U_33 
 _atom_site_aniso_U_23 
 _atom_site_aniso_U_13 
 _atom_site_aniso_U_12 
Ag1 0.166(3) 0.081(3) 0.109(3) 0.0194(16) -0.034(3) -0.021(3) 
C1 0.076(11) 0.039(8) 0.080(11) -0.002(7) 0.001(9) -0.015(8) 
C2 0.072(9) 0.034(6) 0.065(8) -0.012(8) -0.040(9) 0.006(6) 
C3 0.043(10) 0.042(9) 0.29(3) 0.064(16) -0.017(15) 0.000(7) 
C4 0.061(11) 0.053(10) 0.084(12) 0.008(8) 0.001(9) 0.026(8) 
C5 0.045(9) 0.099(12) 0.048(9) -0.012(8) 0.008(7) 0.014(8) 
C6 0.073(10) 0.051(9) 0.033(7) 0.014(6) 0.000(7) 0.003(7) 
C21 0.024(6) 0.046(7) 0.067(8) 0.003(8) -0.027(8) -0.002(5) 
C22 0.052(12) 0.105(18) 0.37(5) -0.12(2) 0.011(18) 0.001(11) 
O23 0.044(6) 0.062(6) 0.139(10) 0.033(8) -0.010(8) -0.008(4) 
O24 0.048(6) 0.103(10) 0.107(9) 0.035(8) 0.010(6) 0.002(6) 
C25 0.026(7) 0.092(12) 0.081(11) -0.043(10) -0.013(6) 0.041(8) 
C32 0.06(2) 0.08(2) 0.05(2) -0.03(2) 0.00(2) 0.03(2) 
N31 0.08(2) 0.13(2) 0.024(14) -0.008(15) -0.010(14) 0.011(18) 
C36 0.10(2) 0.16(3) 0.06(2) 0.03(2) -0.048(19) 0.01(2) 
C35 0.09(2) 0.12(3) 0.05(2) 0.02(2) 0.01(2) 0.04(3) 
C34 0.09(2) 0.11(2) 0.09(2) 0.02(2) 0.01(2) 0.01(2) 
C33 0.06(2) 0.07(2) 0.07(2) 0.015(17) 0.006(18) 0.003(18) 
P40 0.25(2) 0.25(2) 0.25(2) -0.15(3) -0.15(3) 0.15(3) 
F41 0.29(4) 0.17(2) 0.17(3) -0.06(2) 0.12(3) -0.05(2) 
F42 0.20(3) 0.19(3) 0.18(2) 0.03(2) -0.03(2) 0.01(2) 
P50 0.112(8) 0.112(8) 0.112(8) -0.029(7) -0.029(7) -0.029(7) 
P60 0.07(2) 0.14(3) 0.10(3) 0.000 -0.04(2) 0.000 
C32B 0.012(17) 0.16(3) 0.05(2) -0.04(3) -0.009(18) 0.03(2) 
C31B 0.027(17) 0.20(3) 0.08(2) -0.02(2) -0.033(17) 0.03(2) 
C36B 0.034(18) 0.21(4) 0.08(2) 0.02(3) -0.026(18) 0.02(2) 
C35B 0.08(2) 0.21(4) 0.05(2) -0.01(3) -0.02(2) 0.01(3) 
C34B 0.056(19) 0.19(3) 0.07(2) -0.03(2) -0.013(18) 0.06(2) 
N33B 0.055(17) 0.15(3) 0.09(2) -0.058(19) -0.024(16) 0.007(19) 
 
_geom_special_details 
; 
 All esds (except the esd in the dihedral angle between two l.s. planes) 
 are estimated using the full covariance matrix.  The cell esds are taken 
 into account individually in the estimation of esds in distances, angles 
 and torsion angles; correlations between esds in cell parameters are only 
 used when they are defined by crystal symmetry.  An approximate (isotropic) 
 treatment of cell esds is used for estimating esds involving l.s. planes. 
; 
 
loop_ 
 _geom_bond_atom_site_label_1 
 _geom_bond_atom_site_label_2 
 _geom_bond_distance 
 _geom_bond_site_symmetry_2 
 _geom_bond_publ_flag 
Ag1 N33B 2.16(4) 55_665 ? 
Ag1 N31 2.29(4) . ? 
C1 C2 1.3900 . ? 
C1 C6 1.3900 . ? 
C1 C21 1.5977 . ? 
C2 C3 1.3900 . ? 
C3 C4 1.3900 . ? 
C3 O23 1.398(11) . ? 
C4 C5 1.3900 . ? 
C4 O24 1.393(13) . ? 
C5 C6 1.3900 . ? 
C6 C21 1.672(15) 66_566 ? 
C21 C6 1.672(15) 89_646 ? 
C22 O23 1.452(16) . ? 
O24 C25 1.39(2) . ? 
C25 C32 1.42(6) . ? 
C25 C32B 1.52(6) . ? 
C32 N31 1.43(4) . ? 
C32 C33 1.41(4) . ? 
N31 C36 1.37(4) . ? 
C36 C35 1.46(4) . ? 
C35 C34 1.37(4) . ? 
C34 C33 1.45(4) . ? 
P40 F42 1.585(18) 89_646 ? 
P40 F42 1.586(19) 66_566 ? 
P40 F42 1.583(18) . ? 
P40 F41 1.604(18) . ? 
P40 F41 1.606(18) 66_566 ? 
P40 F41 1.603(18) 89_646 ? 
P50 F51 1.558(18) 83_446 ? 
P50 F51 1.558(18) . ? 
P50 F51 1.558(18) 60_545 ? 
P50 F52 1.587(19) 83_446 ? 
P50 F52 1.59(2) . ? 
P50 F52 1.59(2) 60_545 ? 
F51 F52 1.55(5) 60_545 ? 
F52 F51 1.55(5) 83_446 ? 
P60 F61 1.60(2) . ? 
P60 F64 1.60(2) . ? 
P60 F63 1.61(2) 57_656 ? 
P60 F63 1.61(2) . ? 
P60 F62 1.62(2) 57_656 ? 
P60 F62 1.62(2) . ? 
C32B N33B 1.39(4) . ? 
C32B C31B 1.43(4) . ? 
C31B C36B 1.40(4) . ? 
C36B C35B 1.39(4) . ? 
C35B C34B 1.33(4) . ? 
C34B N33B 1.34(4) . ? 
N33B Ag1 2.16(4) 53_645 ? 
 
loop_ 
 _geom_angle_atom_site_label_1 
 _geom_angle_atom_site_label_2 
 _geom_angle_atom_site_label_3 
 _geom_angle 
 _geom_angle_site_symmetry_1 
 _geom_angle_site_symmetry_3 
 _geom_angle_publ_flag 
N33B Ag1 N31 172.1(10) 55_665 . ? 
C2 C1 C6 120.0 . . ? 
C2 C1 C21 108.1 . . ? 
C6 C1 C21 131.0 . . ? 
C3 C2 C1 120.0 . . ? 
C2 C3 C4 120.0 . . ? 
C2 C3 O23 126.6(7) . . ? 
C4 C3 O23 112.6(7) . . ? 
C5 C4 C3 120.0 . . ? 
C5 C4 O24 121.3(8) . . ? 
C3 C4 O24 118.6(8) . . ? 
C4 C5 C6 120.0 . . ? 
C5 C6 C1 120.0 . . ? 
C5 C6 C21 112.4(5) . 66_566 ? 
C1 C6 C21 126.4(4) . 66_566 ? 
C1 C21 C6 102.6(2) . 89_646 ? 
C3 O23 C22 119.7(9) . . ? 
C25 O24 C4 120.5(12) . . ? 
O24 C25 C32 111(2) . . ? 
O24 C25 C32B 117(2) . . ? 
C32 C25 C32B 7(3) . . ? 
N31 C32 C33 118(4) . . ? 
N31 C32 C25 121(3) . . ? 
C33 C32 C25 120(3) . . ? 
C36 N31 C32 117(4) . . ? 
C36 N31 Ag1 124(3) . . ? 
C32 N31 Ag1 118(3) . . ? 
N31 C36 C35 122(4) . . ? 
C34 C35 C36 126(5) . . ? 
C35 C34 C33 109(4) . . ? 
C32 C33 C34 128(4) . . ? 
F42 P40 F42 72(2) 89_646 66_566 ? 
F42 P40 F42 72(2) 89_646 . ? 
F42 P40 F42 72(2) 66_566 . ? 
F42 P40 F41 166(2) 89_646 . ? 
F42 P40 F41 94.2(18) 66_566 . ? 
F42 P40 F41 105(2) . . ? 
F42 P40 F41 94.2(18) 89_646 66_566 ? 
F42 P40 F41 105(2) 66_566 66_566 ? 
F42 P40 F41 166(2) . 66_566 ? 
F41 P40 F41 89(2) . 66_566 ? 
F42 P40 F41 105(2) 89_646 89_646 ? 
F42 P40 F41 166(2) 66_566 89_646 ? 
F42 P40 F41 94.4(18) . 89_646 ? 
F41 P40 F41 89(2) . 89_646 ? 
F41 P40 F41 89(2) 66_566 89_646 ? 
F51 P50 F51 99.8(18) 83_446 . ? 
F51 P50 F51 99.8(18) 83_446 60_545 ? 
F51 P50 F51 99.8(18) . 60_545 ? 
F51 P50 F52 81(3) 83_446 83_446 ? 
F51 P50 F52 158(2) . 83_446 ? 
F51 P50 F52 59(2) 60_545 83_446 ? 
F51 P50 F52 59(2) 83_446 . ? 
F51 P50 F52 81(3) . . ? 
F51 P50 F52 158(2) 60_545 . ? 
F52 P50 F52 116.8(14) 83_446 . ? 
F51 P50 F52 158(2) 83_446 60_545 ? 
F51 P50 F52 59(2) . 60_545 ? 
F51 P50 F52 81(3) 60_545 60_545 ? 
F52 P50 F52 116.8(14) 83_446 60_545 ? 
F52 P50 F52 116.8(14) . 60_545 ? 
P50 F51 F52 61.4(15) . 60_545 ? 
F51 F52 P50 59.5(13) 83_446 . ? 
F61 P60 F64 180.000(5) . . ? 
F61 P60 F63 84(4) . 57_656 ? 
F64 P60 F63 96(4) . 57_656 ? 
F61 P60 F63 84(4) . . ? 
F64 P60 F63 96(4) . . ? 
F63 P60 F63 168(7) 57_656 . ? 
F61 P60 F62 86(2) . 57_656 ? 
F64 P60 F62 94(2) . 57_656 ? 
F63 P60 F62 101(4) 57_656 57_656 ? 
F63 P60 F62 78(4) . 57_656 ? 
F61 P60 F62 86(2) . . ? 
F64 P60 F62 94(2) . . ? 
F63 P60 F62 78(4) 57_656 . ? 
F63 P60 F62 101(4) . . ? 
F62 P60 F62 172(5) 57_656 . ? 
N33B C32B C31B 118(5) . . ? 
N33B C32B C25 110(4) . . ? 
C31B C32B C25 132(4) . . ? 
C36B C31B C32B 118(5) . . ? 
C35B C36B C31B 123(5) . . ? 
C34B C35B C36B 115(5) . . ? 
C35B C34B N33B 128(5) . . ? 
C34B N33B C32B 118(5) . . ? 
C34B N33B Ag1 121(3) . 53_645 ? 
C32B N33B Ag1 120(3) . 53_645 ? 
 
_diffrn_measured_fraction_theta_max    0.975 
_diffrn_reflns_theta_full              21.70 
_diffrn_measured_fraction_theta_full   0.975 
_refine_diff_density_max    1.015 
_refine_diff_density_min   -0.516 
_refine_diff_density_rms    0.142 
